1 **Ebselen Exhibits Antimicrobial Activity Against *Clostridioides difficile***  
2 **By Disrupting Redox Associated Metabolism**

3 Ravi K.R. Marreddy<sup>1</sup>, Abiola O. Olaitan<sup>1</sup>, Jordan N. May<sup>1</sup>, Min Dong<sup>2</sup>, Julian G. Hurdle<sup>1\*</sup>

4

5 <sup>1</sup>Center for Infectious and Inflammatory Diseases, Institute of Biosciences and  
6 Technology, Texas A&M Health Science Center, 2121 West Holcombe Blvd, Houston,  
7 Texas 77030, USA

8

9 <sup>2</sup>Department of Urology, Boston Children's Hospital, Department of Surgery and  
10 Department of Microbiology, Harvard Medical School, Boston, Massachusetts 02115,  
11 USA

12 \*Correspondence and requests for materials should be addressed to J.G.H  
13 ([jhurdle@tamu.edu](mailto:jhurdle@tamu.edu)).

14

15

16

17

18 **Running title:** Ebselen kills *C. difficile* by oxidative damage

19 **Keywords:** Redox stress, thiols, toxins, spores

20

21

22

23

24 **ABSTRACT**

25 High recurrence rates and spread of antibiotic-resistant strains necessitate the need for  
26 alternative therapeutics for *Clostridioides difficile* infections (CDIs). Ebselen, a reactive  
27 organoselenium compound inhibits *C. difficile* virulence toxins TcdA and TcdB, by  
28 covalently binding to their cysteine protease domains. Ebselen is thought to lack  
29 antibacterial activity against *C. difficile* cells and its anti-toxin action is suggested to be  
30 solely responsible for its efficacy. However, *C. difficile* has several essential cysteine-  
31 containing enzymes that could be potential sites for covalent modification by ebselen;  
32 hence, we re-evaluated its anti-*C. difficile* properties. In BHI agar, ebselen inhibited  
33 almost all *C. difficile* strains (MICs of 2-8 µg/ml), with ribotype 078 being intrinsically  
34 resistant (MIC>64 µg/ml). Wilkins-Chalgren and Brucella agars are recommended  
35 media for anaerobic susceptibility testing. Ebselen was either slightly attenuated by  
36 pyruvate found in Wilkins-Chalgren agar or obliterated by blood in Brucella agars.  
37 Transcriptome analysis showed ebselen altered redox-associated processes, cysteine  
38 metabolism and significantly enhanced the expression of Stickland proline metabolism  
39 to likely regenerate NAD<sup>+</sup> from NADH. Intracellularly cells increased the uptake of  
40 cysteines, depleted non-protein thiols and disrupted NAD<sup>+</sup>/NADH redox ratio. Growth  
41 inhibitory concentrations of ebselen also reduced toxin and spore production. Taken  
42 together, ebselen has bactericidal activity against *C. difficile*, with multiple mechanisms  
43 of action that negatively impacts toxin production and sporulation. To harness the  
44 polypharmacological properties of ebselen, chemical optimization is warranted,  
45 especially to obtain derivatives that could be effective in severe CDI, where intestinal  
46 bleeding could occur.

47

48

## 49 INTRODUCTION

50 *Clostridioides difficile* is a Gram-positive, spore forming anaerobe and the leading cause  
51 of antibiotic associated diarrhea in hospitals (1). *C. difficile* virulence results from  
52 production of two glucosyltransferase toxins (Toxin A [TcdA] and Toxin B [TcdB]) (2).  
53 These toxins disrupt intestinal epithelial cells by glycosylating Rho/Rac family of  
54 GTPases, triggering actin condensation and loss of tight junctions. This leads to  
55 inflammation and increased permeability of the gut, tissue necrosis and diarrhea (2). For  
56 about 40 years, the antibiotics metronidazole and vancomycin have been the front-line  
57 treatments for CDI. These antibiotics being broad-spectrum in action further disrupts the  
58 gut microbiota during treatment. This increases the risk of recurrent CDI (rCDI) that  
59 occurs in  $\geq 20\%$  of CDI patients (3). Furthermore, infections with epidemic strains,  
60 particularly the epidemic B1/NAP1/027 lineage, have drastically reduced the ability to  
61 treat CDI (4, 5). Therefore, there is a need for novel CDI therapeutics.

62 The discovery of alternative CDI therapeutics have focused on blocking the toxin  
63 action with toxin binders (e.g. tolevamer) (6), vaccines (7), antibodies such as  
64 bezlotoxumab, a monoclonal antibody to TcdB (8) and microbiome-based intervention,  
65 such as fecal microbiota transplantation (9, 10). More recently, the organoselenium  
66 compound ebselen (2-phenyl-1,2-benzisoselenazol-3(2H)-one) was identified from a  
67 high-throughput screen for inhibitors of the cysteine protease domains (CPDs) of *C.*  
68 *difficile* toxins (11). Ebselen directly inhibits both TcdA and TcdB, by forming a covalent  
69 bond with the active site cysteine in the toxins CPDs. The CPD is important for toxin  
70 action, since their activation by host 1D-myo-inositol hexakisphosphate (IP6) triggers  
71 autocleavage and release of the glucosyltransferase domains of TcdA and TcdB.

72 Studies in mice showed ebselen could attenuate CDI caused by the lab strain *C. difficile*  
73 630 (11).

74 Ebselen is a polypharmacological molecule, which is known as a promising  
75 therapeutic for multiple disorders, due to its anti-inflammatory, antioxidative and  
76 cryoprotective properties (12-15). Ebselen has strong antimicrobial activities against  
77 yeast (16) and selective bacteria, namely Gram-positive bacteria (17-19). It also shows  
78 multiple modes of actions against yeast, including inhibiting the proton  
79 translocation/ATPase activities (16), targeting glutamate dehydrogenase leading to  
80 reactive oxygen species (ROS) (13) and activating DNA damage, thereby altering  
81 nuclear proteins (20). In the case of bacteria, ebselen was shown to inhibit thioredoxin  
82 reductase enzyme (TrxR) by blocking electron transfer from NADPH to their substrates  
83 (21). Thioredoxin (Trx) and glutaredoxin (Grx) systems regulate various critical cellular  
84 functions, including ribonucleotide reductase (RNR), peroxiredoxins and methionine  
85 sulfoxide reductases (22, 23). Disruption of these cellular functions is often lethal, since  
86 the RNR protein is crucial for DNA replication by reducing ribonucleotides to  
87 deoxyribonucleotides (22), while peroxiredoxins and methionine sulfoxide reductases  
88 protects against oxidative stress (23). Bacteria with both Trx and Grx systems need only  
89 one system to counteract ebselen exposure, hence it is more active against species  
90 containing only the TrxR system (19, 21). Our review of *C. difficile* genomes revealed  
91 they possess the Trx system, appearing to lack Grx. Furthermore, *C. difficile* has  
92 multiple proteins with active site cysteines. This prompted us to question whether  
93 ebselen could have antimicrobial activity against *C. difficile* cells. Our results show that  
94 ebselen is bactericidal against *C. difficile*, but this property is masked by the presence of

95 blood in culture medium. Cellular activity was confirmed from changes to the  
96 transcriptome and redox associated metabolites, showing that *C. difficile* readjusts its  
97 metabolism to combat ebselen-induced oxidative damage.

98

## 99 RESULTS

100 **Ebselen displays antimicrobial activity against *C. difficile*.** We first confirmed that  
101 ebselen protects Vero epithelial cells from TcdB cytopathy (i.e. cell rounding), in a dose-  
102 dependent manner (**Fig. S1**); its EC<sub>50</sub> was 12.93 μM, somewhat 64-fold lower than  
103 reported (11), using protein from List Biological Laboratories, Inc. We next evaluated the  
104 MICs of ebselen against 12 strains of *C. difficile*, by the Clinical and Laboratory  
105 Standards Institute (CLSI) method using Wilkins-Chalgren agar or Brucella agar  
106 (supplemented with hemin (5 mg/L), vitamin K (1 mg/L) and 5% (v/v) defibrinated sheep  
107 blood. As described in **Table 1**, ebselen was not active against the test strains in  
108 Brucella media (MIC is ≥128 μg/ml). In Wilkins-Chalgren agar ebselen only displayed  
109 weak to moderate MICs of 16 – 64 μg/ml; except for a ribotype 002 strain, all other  
110 strains were slightly susceptible to ebselen (**Table 1**). Next we tested ebselen in BHI  
111 medium, which revealed it had substantial inhibitory activity against most *C. difficile*  
112 strains tested, with MICs ranging from 4 - 8 μg/ml (**Table 1**). Only strains belonging to  
113 ribotype 078 were refractory to ebselen (MIC = 32-128 μg/ml, **Table S1**). The difference  
114 in MICs between the types of media was further investigated. Wilkins-Chalgren agar  
115 contains hemin and sodium pyruvate, which we reasoned could alter biological redox  
116 processes in *C. difficile*. Hence, we supplemented BHI agars with hemin or pyruvate  
117 components. Supplementation with hemin (5 μg/ml) did not alter MICs (*data not shown*),

118 whereas addition of 1 g/L of pyruvate worsened MICs by 2-16-fold (**Table 1**). We further  
119 tested the effect of blood used in Brucella agars; the activity of ebselen was ablated  
120 (MIC >128 µg/ml; **Table 1**) when BHI agar was supplemented with 5% (v/v) defibrinated  
121 sheep blood. In contrast, vancomycin strongly inhibited the growth of all tested strains  
122 irrespective of media composition with MICs of 0.5 – 2 µg/ml (**Tables 1** and **S1**). These  
123 observations reveal that the activity of ebselen against *C. difficile* is strongly influenced  
124 by the composition of the medium used in susceptibility testing and implies  
125 environmental conditions could affect its antibacterial activity.

126

127 **Ebselen is bactericidal.** At its MBC of 16 µg/ml ebselen killed >99.9% of logarithmic  
128 cells of R20291; thus, ebselen was bactericidal at 8 x its MIC.

129

130 **Activity of ebselen against representative gut flora.** We tested ebselen against  
131 various gut bacterial anaerobes (**Table 2**). It did not primarily inhibit growth of  
132 *Bacteroides spp.* and *Porphyromonas uenonis* (MIC is ≥128 µg/ml), but it inhibited the  
133 growth of *A. viscosus* (MIC=2 µg/ml), *L. crispatus* (MIC=32 µg/ml), *L. johnsonii*  
134 (MICs=8-16 µg/ml), *F. nucleatum* (MICs=4 µg/ml) and *F. periodonticum* (MIC=8 µg/ml).  
135 Similar to the observations for *C. difficile*, addition of 5% (v/v) defibrinated sheep blood  
136 diminished the activity of ebselen. As a control, vancomycin inhibited these strains with  
137 MICs of 0.5 – 8.0 µg/ml, except against *Bacteroides sp.* HM19 (MIC >32 µg/ml). These  
138 observations confirm that blood impairs the antimicrobial activity of ebselen and that  
139 ebselen may not inhibit growth of *Bacteroides* species.

140

141 **Transcriptome analysis of ebselen mode of action against *C. difficile*.** Ebselen  
142 inhibits bacterial TrxR and also disrupts multiple macromolecular processes in *S.*  
143 *aureus* i.e. DNA, RNA, proteins, lipid and cell wall biosynthesis (17, 19). To better  
144 understand how ebselen inhibits *C. difficile* growth, we analyzed the global  
145 transcriptional response of *C. difficile* R20291 by RNA sequencing (RNAseq). RNA  
146 samples were prepared from three independent biological replicates. The raw data of  
147 the analysis is deposited in NCBI database under accession number PRJNA647225.  
148 The volcano plot in **Fig. 1A** shows differences in gene expression between the  
149 untreated and ebselen-treated cultures. A total of 565 genes (**Fig. 1B** and **Table S2**)  
150 were differentially expressed by ebselen exposure (FDR <0.01 and fold change >2.0),  
151 of which 360 were upregulated and 205 were downregulated. Transcription of several  
152 metabolic pathways were altered, suggesting ebselen imposed a metabolic burden  
153 (**Table S2**). Various ribosomal proteins and proteins involved in amino acid metabolism  
154 were upregulated. Transcript levels for molecular chaperones were unchanged,  
155 suggesting ebselen did not impose a burden on protein misfolding in cells. Proteins  
156 involved in DNA mismatch repair and homologous recombination were also  
157 upregulated. Ebselen also enhanced transcription of various transporters involved in the  
158 uptake of sugars, iron, sulfur and amino acids. Expression levels for flagellar assembly  
159 and bacterial chemotaxis were also upregulated. The most remarkable changes were  
160 those associated with bacterial redox, as discussed in the below sections.

161

162 **Ebselen increases cysteine pool, while depleting non-protein thiols.** Since *C.*  
163 *difficile* has three TrxR, we hypothesized ebselen might inhibit one or more of these



164 enzymes and alter the expression of thioredoxins (*trx*) genes that depend on TrxR.  
165 However, it did not substantially affect the transcription of thioredoxins in the RNAseq  
166 (**Table S2 and Fig. 1C**); although, thioredoxin genes were not induced by ebselen, they  
167 are known to respond to reactive stress from metronidazole (24). Furthermore, the MICs  
168 of ebselen were not shifted by expression of three *trx* genes (*trxA1*, *trxB1* and *trxB3*) on  
169 plasmid pRPF185 in R20291 (*data not shown*). Transcription of genes regulated by the  
170 Trx system were also unaffected i.e. expression of RNR, peroxiredoxin (*bcp*) and  
171 methionine sulfoxide reductase (*msrAB*) were unaffected. Transcription of superoxide  
172 dismutase (*sodA*) was also unaffected suggesting that ebselen did not induce the  
173 formation of ROS. Therefore, the anti-*C. difficile* activity of ebselen might be  
174 independent of the Trx system. Albeit, biophysical and biochemical characterization will  
175 be required to better determine if ebselen inhibits one or more of *C. difficile* TrxRs.

176 Interestingly, our RNAseq showed that transcript levels for cysteine metabolism  
177 was affected, as genes *cysM* (O-acetylserine sulfhydrylase) and *cysA* (serine  
178 acetyltransferase) were downregulated by 1.72 and 1.84-fold respectively (**Table S2**).  
179 RT-qPCR confirmed that *cysA* was downregulated by  $8.7 \pm 1.6$  – fold (**Fig. 1C**); we also  
180 found that *cysK*, encoding another O-acetylserine sulfhydrylase, was downregulated by  
181  $12.4 \pm 3.99$ -fold. CysM, CysA and CysK are thought to be involved in cysteine  
182 degradation or cysteine biosynthesis from serine (25). Interestingly, expression of the  
183 ABC cystine/cysteine transporter subunit (*CDR20291\_2078*) was upregulated by 3.96-  
184 fold (**Table 3**), which was confirmed by RT-qPCR ( $3.4 \pm 1.6$ -fold upregulation) (**Fig.**  
185 **1C**). Based on these findings, we hypothesized that ebselen exposed cells might  
186 accumulate cystine/cysteine. We therefore exposed cells to various concentrations of

187 ebselen for 1 h and quantified intracellular concentrations of cysteine. Intracellular  
188 cysteine levels were not significantly affected by 2 and 4  $\mu\text{g/ml}$  of ebselen, but 8 and 16  
189  $\mu\text{g/ml}$  enhanced cysteine pools by  $5.84 \pm 2.13$  ( $p = 0.02$ ) and  $7.64 \pm 2.1$  – fold ( $p =$   
190  $0.0036$ ), respectively (**Fig. 2A**). This supports the above hypothesis that cells  
191 accumulated cysteine in response to bactericidal concentrations of ebselen. As a  
192 negative control, intracellular cysteine levels were not affected by an inhibitory  
193 concentration of vancomycin (1  $\mu\text{g/ml}$ ).

194 Low molecular weight (LMW) non-protein thiols serve as a defense mechanism  
195 against reactive species. To evaluate if ebselen also interfered with non-protein thiols,  
196 we quantified the free thiol content of cells. The levels of LMW non-protein thiols were  
197 not altered by 2 and 4  $\mu\text{g/ml}$  of ebselen, whereas the thiol content was significantly  
198 reduced by  $59.6 \pm 2.45$  ( $p = <0.0001$ ) and  $48.1 \pm 6.6$  – fold ( $p = 0.0006$ ) with 8 and 16  
199  $\mu\text{g/ml}$  of ebselen, respectively (**Fig. 2B**). The control vancomycin (1  $\mu\text{g/ml}$ ) did not  
200 impact the LMW thiol pool (**Fig. 2B**). Based on these observations, we speculate that *C.*  
201 *difficile* adopts LMW thiols to detoxify ebselen and it might transport cystine/cysteine  
202 into cells to replete thiol pools.

203  
204 **Regulation of NAD<sup>+</sup> generating pathways and energy generation.** The most  
205 significantly upregulated genes by ebselen belonged to the proline reductase subunit  
206 (*prdA*, *prdB*, *prdC* and *prdF*), which were upregulated by 3 to 8-fold (**Table 3**). Analysis  
207 by RT-qPCR revealed that *prdA* and *prdF* were upregulated by  $3.3 \pm 1.1$  and  $2.5 \pm 1.2$  –  
208 fold, respectively (**Fig. 1D**). *C. difficile* proline reductase is a selenoenzyme that is  
209 crucial for maintaining cellular redox balance and generating energy via the Stickland

210 pathway (26). The Stickland reaction involves a series of coupled oxidation and  
211 reduction of amino acid pairs, in which oxidation of amino acids lead to formation of  
212 ATP and NADH while the reductive pathway regenerates NAD<sup>+</sup> from NADH. Similar to  
213 proline reductases, glycine reductase also regenerates NAD<sup>+</sup> from NADH in the  
214 alternate branch of the Stickland pathway (27). RT-qPCR revealed that mRNA for glycine  
215 reductase subunits *grdD* and *grdX* were down regulated by  $4.2 \pm 1.99$  and  $17.4 \pm 2$  -  
216 fold respectively (**Fig. 1C**), even though these genes were not significantly  
217 downregulated in the RNAseq (**Table S2**). Upregulation of proline reductase genes, and  
218 downregulation of glycine reductase genes, suggest activation of proline metabolism for  
219 the purpose of generating NAD<sup>+</sup>. Proline reductase is thought to be the preferred route  
220 for NAD<sup>+</sup> regeneration in *C. difficile* (27). We therefore quantified how ebselen  
221 influenced the cellular ratio of NAD<sup>+</sup>/NADH. As shown in **Fig. 2C**, ebselen decreased  
222 cellular amounts of NADH leading to disruption of the intracellular NAD<sup>+</sup>/NADH ratio,  
223 whereas vancomycin did not have an impact. Proline reduction is thought to also result  
224 in a proton motive force by coordinating with the electron transport Rnf complex and the  
225 resulting ion gradient may be used to generate ATP by the ATP synthase (28).  
226 Consistent with upregulation of proline reductase genes, ATP synthase subunits *atpD*,  
227 *atpF* and *atpG* were also upregulated, along with the electron transport protein complex  
228 encoded by *rnfA*, *rnfC*, *rnfD*, *rnfE* and *rnfG* (**Table 3**). RT-qPCR showed that transcript  
229 levels for *atpG* were upregulated by  $1.62 \pm 0.6$  -fold (**Fig. 1D**). Hence, in ebselen  
230 exposed cells proline may be used for both energy production and NAD<sup>+</sup> formation.

231 Other pathways associated with energy metabolism were also altered. For e.g.  
232 R20291 exposed to ebselen upregulated genes involved in synthesizing acetyl CoA e.g.

233 genes for ethanolamine utilization (*eutA*, *eutB* and *eutL*). Conversion of ethanolamine to  
234 acetyl CoA requires coenzyme B12 (cobalamin), which may explain the significant  
235 upregulation of cobalamin biosynthesis genes (*cbiE*, *cbiF*, *cbiH*, *cbiK* and *cbiT*). This  
236 further suggests ebselen altered energy metabolism.

237 **Table 1** shows that supplementation of BHI with 1 g/L of pyruvate weakened the  
238 activity of ebselen activity against *C. difficile*. Pyruvate enters various metabolic  
239 pathways in *C. difficile*; for example, it can be converted to acetyl CoA by pyruvate-  
240 ferredoxin oxidoreductase (PFOR) encoded by *nifJ*, which was upregulated by 1.69-  
241 fold. Alternately, PFOR can convert acetyl CoA to pyruvate, which can be converted to  
242 formate by pyruvate lyase, which goes on to generate protons. Unfortunately, the  
243 transcriptional snapshot of the cell, and test conditions, did not provide an adequate  
244 insight to how pyruvate affects the action of ebselen.

245

#### 246 **Growth inhibitory concentrations of ebselen inhibits *C. difficile* toxin production.**

247 Various factors are known to influence the expression of *tcdA* and *tcdB* (29). For  
248 example, activation of PrdR represses toxin gene expression (30), whereas  
249 overexpression of Agr, a two-component regulatory system, enhances the toxin gene  
250 expression (31). The *agr* loci comprises of *agrD* that produces a signal peptide, which is  
251 recognized by the membrane bound kinase AgrC. Once activated AgrC phosphorylates  
252 the DNA-binding response regulator AgrA leading to its dimerization and binding to  
253 promoters, thus upregulating the *agr* operon and virulent genes. The Agr operon (*agrB*  
254 and *agrD*, 2.33 and 2.23 -fold decrease respectively) was downregulated by ebselen  
255 (**Table S2**); this was confirmed by RT-qPCR showing *agrA* was decreased by  $5.9 \pm 2.4$

256 -fold (**Fig. 1C**). These observations implied that ebselen could reduce toxin production  
257 through PrdR activation and Agr downregulation. RT-qPCR showed that *tcdA* and *tcdB*  
258 were downregulated by  $6.74 \pm 1.14$  and  $6.68 \pm 3.76$  -fold, respectively (**Fig. 1C**). We  
259 next quantified toxins by ELISA using stationary phase cultures that were exposed to a  
260 sub-cidal concentration of ebselen (2  $\mu\text{g/ml}$ ) for 24 h. As shown in **Fig. 3A**, ebselen (2  
261  $\mu\text{g/ml}$ ) inhibited TcdA and TcdB production by ~50 and ~40% respectively. At growth  
262 inhibitory concentrations (4 and 8  $\mu\text{g/ml}$ ), production of both TcdA and TcdB were  
263 inhibited by >80% ( $p < 0.0002$ ). As a positive control, glucose (1% w/v) strongly  
264 inhibited toxin production (**Fig. 3A**), in contrast to the negative control vancomycin (1  
265  $\mu\text{g/ml}$ ).

266

267 **Ebselen inhibits *C. difficile* spore production.** Considering the significant impact of  
268 ebselen on growth of *C. difficile*, we determined whether it impacts sporulation. A mixed  
269 transcriptional response was observed for sporulation genes (**Table 3**), where mRNA  
270 for stage 0 (*spo0A*) was significantly downregulated, but stage II (*spoIIAA* and *spoIIC*)  
271 were upregulated. To directly test if ebselen hindered sporulation, we quantified spore  
272 formation in cultures exposed to ebselen for 5-days. Ebselen only inhibited sporulation  
273 at 8  $\mu\text{g/ml}$ , as there was only  $13.4 \pm 6.8\%$  ( $p = 0.003$ ) spores in total population after  
274 treatment (**Fig. 3B**). Although, sporulation inhibition by ebselen was comparable to the  
275 positive control acridine orange (30  $\mu\text{g/ml}$ ), ebselen (8  $\mu\text{g/ml}$ ) also caused a 1 log  
276 reduction in viable cells, implying that spore reduction is coupled to cell death.

277

278 **DISCUSSION**

279 Our findings lead to an updated model of ebselen anti-*C. difficile* properties, combining  
280 the prior report that it protects epithelial cells from TcdA and TcdB and our data showing  
281 it kills *C. difficile* cells and blocks the biogenesis of toxins and spores. Its antibacterial  
282 activity would have gone undetected save for our routine use of BHI broth, since the  
283 CLSI recommended media masks the activity of ebselen. Indeed, media for anaerobic  
284 susceptibility testing contains pyruvate and/or blood, which reduces or inactivates the  
285 activity of ebselen, respectively. There are a number of possibilities to explain this  
286 observation. Firstly, ebselen may react with thiols found in blood proteins or glutathione  
287 in blood for e.g. it is known to react with the plasma protein albumin (32). This would  
288 reduce the free fraction of unreacted ebselen for cellular activity against *C. difficile* in  
289 blood agars. Secondly, we speculate that because pyruvate is a substrate for multiple  
290 pathways, it may adjust metabolism to counter oxidative damage by ebselen.  
291 Interestingly, even in BHI media, PCR ribotype-078 strains were refractory to killing by  
292 ebselen. In theory, if the reported *in vivo* efficacy of ebselen in mice (11) arises from a  
293 combination of anti-toxin and antibacterial actions, then environmental conditions and  
294 drug resistance could hinder its activity. This may occur in CDI with intestinal bleeding  
295 and by reactions with thiol proteins such as biliary glutathione. Therefore, ebselen might  
296 need to be administered in colon specific formulations to bolster its luminal  
297 concentrations and free fraction of unmetabolized drug reaching the colon. Albeit,  
298 ebselen-resistant strains could undermine its therapeutic coverage, if antibacterial  
299 action is required for efficacy.

300 In determining the impact of ebselen on *C. difficile* cell physiology, we identified  
301 that it induces pathways consistent with its classification as a reactive antimicrobial.

302 Indeed, ebselen altered cysteine metabolism, as reflected by upregulation of  
303 cystine/cysteine uptake transporters, increase cystine/cysteine content in cells and  
304 depleted the intracellular non-protein thiols. The reduction of non-protein thiols is  
305 probably due to these molecules reacting with the selenyl-sulfide bond of ebselen (33).  
306 The depletion of cellular thiols might have also been lethal to *C. difficile*, by triggering an  
307 imbalance of redox sensitive reactions. Certainly, we observed a dramatic impact on  
308 NAD<sup>+</sup>/NADH ratio and substantial upregulation of the proline reductase operon. Proline  
309 reductase is a selenium dependent enzyme that catalyzes reductive deamination of  
310 proline to 5-aminovalerate. It regenerates NAD<sup>+</sup> from NADH (26) and this is thought to  
311 be the preferred route for NAD<sup>+</sup> regeneration by *C. difficile*. PrdR, a sigma-54  
312 dependent transcriptional regulator, activates expression of the *prd* operon and  
313 represses the *grd* operon. Upregulation of *prdR* signifies that in presence of reactive  
314 ebselen, *C. difficile* regenerated NAD<sup>+</sup> through proline reduction (27). The fact that  
315 NADH concentrations were severely reduced by ebselen also supports this view, since  
316 low NADH levels favor expression of the redox dependent-transcriptional repressor *rex*  
317 (27, 34). Rex also suppresses the *grd* operon, as a less favored path for NAD<sup>+</sup>  
318 regeneration in *C. difficile* (27). Currently, there is a growing impetus to better  
319 understand biological redox processes in *C. difficile* metabolism (28). We suggest that  
320 ebselen could be a useful probe to understand pathophysiological changes in response  
321 to oxidative stress.

322 Besides killing *C. difficile*, ebselen at its MIC (2 µg/ml) suppressed toxin  
323 production, while its inhibition of sporulation correlated with cell killing at 8 µg/ml (<sup>1</sup>/<sub>2</sub> x  
324 its MBC). Nonetheless, both findings show that ebselen imposes secondary effects that

325 limit *C. difficile* virulence. This is somewhat similar to observations in *Staphylococcus*  
326 *aureus*, where ebselen inhibited  $\alpha$ -hemolysin production and inhibited protein, DNA,  
327 RNA and cell envelope synthesis (17). Taken together, we clearly show that ebselen's  
328 anti-virulence properties goes beyond deactivating the CPD domain of TcdA and TcdB.  
329 In our pilot experiments, in a mouse colitis CDI model, ebselen did not rescue animals  
330 from becoming moribund when given at 10 or 100 mg/kg/day (**Fig. S2**); though animal  
331 numbers were not statistically powered. This is consistent with a recent report where  
332 ebselen did not rescue hamsters from becoming moribund due to CDI (35). In  
333 conclusion, if ebselen is to be used as a drug for CDI then chemical modification is  
334 needed to harness its polypharmacological properties and to extend its coverage to *C.*  
335 *difficile* ribotypes that show intrinsic antimicrobial resistance to ebselen.

336

## 337 **MATERIALS AND METHODS**

338 **Bacterial strains, growth conditions and antibiotics.** With the exception of *C. difficile*  
339 R20291, the various PCR-ribotypes of *C. difficile* and human gut bacteria were from  
340 Biodefense and Emerging Infectious Research Resource Repository (BEI Resources,  
341 Manassas, VA) and the American type Culture Collection (ATCC, Manassas, VA). *C.*  
342 *difficile* strains were grown in Brain Heart Infusion (BHI) agar or broth medium at 37°C  
343 in an anaerobic chamber (Don Whitley A35 anaerobic chamber). Other species were  
344 routinely grown in Brucella agar supplemented with 5% (v/v) defibrinated sheep blood  
345 (Hardy Diagnostics), 5 mg/L Hemin and 10 mg/L vitamin K1. The antibiotics were  
346 purchased from: Sigma (vancomycin), Acros organics (metronidazole) and Enzo life  
347 sciences (ebselen).

348



349 **Susceptibility testing.** MICs were determined by the agar dilution method, as  
350 described previously (36). Briefly, serially diluted test compounds were added to molten  
351 agars of respective media and 3  $\mu$ l ( $\sim 10^5$  CFU/ml) of overnight cultures were spotted  
352 onto agars using the semi-automated liquid handling benchtop pipettor (Sorenson  
353 Bioscience Inc.). After anaerobic incubation at 37°C for 24 h, the lowest concentration of  
354 compound inhibiting visible growth was recorded as the MIC. Agars used were BHI,  
355 Brucella with above supplementation and Wilkins-Chalgren. When needed BHI was also  
356 supplemented with 5% (v/v) defibrinated sheep blood, 1 g/L Na-pyruvate or hemin (5  
357 mg/L).

358

359 **MBC determination.** Cultures were grown to OD<sub>600nm</sub>  $\sim 0.2$  and exposed to varying  
360 concentrations of ebselen. Total viable counts were determined, at time 0 and 24 h, by  
361 plating serial dilutions of bacteria onto BHI agar plates. The MBC was defined as the  
362 lowest of compound killing 3 logs of cells from time 0.

363

364 **Transcriptome analysis.** Overnight cultures of *C. difficile* R20291 were inoculated in  
365 50 ml of fresh BHI medium and cultured until OD<sub>600</sub>  $\approx 0.2$  (T<sub>0</sub>). Ebselen was added to a  
366 final concentration of 8  $\mu$ g/ml and cultures incubated for a further 30 min. Cells were  
367 harvested by the addition of one volume of RNAprotect bacterial reagent (Qiagen)  
368 followed by centrifugation at 4000 x g for 10 min. Bacterial cells without ebselen  
369 treatment were prepared as a control. Cell pellets were resuspended in 700  $\mu$ l of Qiazol  
370 lysis reagent (Qiagen) and lysed in a Fastprep cell disruptor at force 50 for 5 min. The  
371 total RNA was extracted using the RNeasy Mini Kit (Qiagen), according to

372 manufacturer's instructions. RNA Sample QC, DNase treatment, library preparations  
373 and HiSeq 2x150 Paired End sequencing were performed by GENEWIZ (South  
374 Plainfield, NJ, USA).

375

376 **Bioinformatic analysis.** Raw FASTQ files were uploaded onto galaxy platform  
377 (<https://usegalaxy.org/>). Quality control and trimming were done using FastQC  
378 (Babraham Bioinformatics) and Trim Galore, respectively. Reads were mapped to  
379 R20291 as reference and was performed with BWA-MEM program. Counts per Read  
380 was generated with htseq-count and count matrix was generated with Join all counts  
381 program. The count matrix file was uploaded onto Degust  
382 (<http://degust.erc.monash.edu/>) to generate differential gene expression file using  
383 edgeR (cut-offs abs FC = 2.0 and FDR= 0.01).

384

385 **Gene expression analysis by quantitative PCR.** RNA extraction was performed as  
386 indicated above. cDNA was prepared from 10 µg of total RNA using qScript cDNA  
387 supermix (Quanta Biosciences). Quantitative PCR was performed with qScript SYBR  
388 Green RT-qPCR master mix (Quanta Biosciences) using Applied Biosystems ViiA7 RT-  
389 PCR system. The  $C_T$  values obtained were normalized to housekeeping 16S rRNA and  
390 the results were calculated using the  $2^{-\Delta\Delta C_T}$  method. The primers used are shown in

391 **Table S2.**

392

393 **Cysteine quantification.** Overnight cultures of *C. difficile* R20291 were diluted 20-fold  
394 into a fresh medium and grown until  $OD_{600} \approx 0.3$ . Compounds were added at varying

395 concentrations and cultures incubated for 1 h. Cells were harvested by centrifugation  
396 (4000 x g for 10 min) and cell pellets resuspended in ice cold phosphate buffer. Cells  
397 were lysed in FastPrep (Qiagen) for 10 min, centrifuged at 21,100 x g for 5 min and  
398 cysteine content quantified using the Cysteine Assay Kit from Sigma-Aldrich according  
399 to manufacturer's instructions. Cellular cysteine levels were normalized in cell lysates,  
400 by protein content determined using Pierce BCA Protein Assay Kit.

401

402 **Thiol quantification.** Cell lysates obtained above were treated with 5% (w/v)  
403 trichloroacetic acid for 15 min at room temperature. Precipitated proteins were removed  
404 by centrifugation (21,100 x g for 5 min) and the pH of supernatants neutralized with 1 M  
405 Tris-base. LMW thiols were quantified using Thiol Fluorescent Detection Kit (Invitrogen)  
406 according to the manufacturer's instructions and were normalized by protein content.

407

408 **NAD/NADH quantification.** Cells were harvested as above, resuspended in PBS buffer  
409 and diluted with an equal volume of base solution (0.2N NaOH with 1% (w/v) dodecyl  
410 trimethylammonium bromide [DTAB]). After lysing in FastPrep lysates were centrifuged  
411 at 21,100 x g for 5 min. Both NAD<sup>+</sup> and NADH were quantified using NAD/NADH<sup>TM</sup>-  
412 GLO kit (Promega) according to manufacturer's instructions. NAD<sup>+</sup> and NADH  
413 concentrations were normalized by protein content.

414

415 **Toxin quantification.** TcdA and TcdB were quantified from supernatants of 24 h  
416 cultures of R20291, using the *C. difficile* toxin A or B ELISA kit (tgcBIOMICS), according

417 to the manufacturer's instructions. Cultures were exposed to ebselen, vancomycin or  
418 glucose for 24 h.

419

420 **Sporulation assay.** This assay was performed as described previously (37). Briefly,  
421 cultures were allowed to grow until  $OD_{600} \approx 0.3$  in BHI before the addition of test  
422 compounds at varying concentrations. Cultures were incubated for 5 days and  
423 sporulation evaluated as the percent of heat resistant spores per total viable count.

424 **ACKNOWLEDGEMENTS.** This work was funded by grant R01AI132387 from the  
425 National Institute of Allergy and Infectious Diseases at the National Institutes of Health.  
426 The funders had no role in study design, data collection and interpretation of the  
427 findings, or in the writing and submission of the manuscript.

428

429 **REFERENCES**

- 430 1. Guh AY, Mu Y, Winston LG, Johnston H, Olson D, Farley MM, Wilson LE,  
431 Holzbauer SM, Phipps EC, Dumyati GK, Beldavs ZG, Kainer MA, Karlsson M,  
432 Gerding DN, McDonald LC, Emerging Infections Program *Clostridioides difficile*  
433 Infection Working G. 2020. Trends in U.S. burden of *Clostridioides difficile*  
434 infection and outcomes. N Engl J Med 382:1320-1330.
- 435 2. Chandrasekaran R, Lacy DB. 2017. The role of toxins in *Clostridium difficile*  
436 infection. FEMS Microbiol Rev 41:723-750.
- 437 3. Vardakas KZ, Polyzos KA, Patouni K, Rafailidis PI, Samonis G, Falagas ME.  
438 2012. Treatment failure and recurrence of *Clostridium difficile* infection following  
439 treatment with vancomycin or metronidazole: a systematic review of the  
440 evidence. Int J Antimicrob Agents 40:1-8.
- 441 4. Weiner LM, Fridkin SK, Aponte-Torres Z, Avery L, Coffin N, Dudeck MA,  
442 Edwards JR, Jernigan JA, Konnor R, Soe MM, Peterson K, McDonald LC. 2016.  
443 Vital signs: preventing antibiotic-resistant infections in hospitals - United States,  
444 2014. MMWR Morb Mortal Wkly Rep 65:235-41.
- 445 5. Shah DN, Chan FS, Kachru N, Garcia KP, Balcer HE, Dyer AP, Emanuel JE,  
446 Jordan MD, Lusardi KT, Naymick G, Polisetty RS, Sieman L, Tyler AM, Johnson  
447 ML, Garey KW. 2016. A multi-center study of fidaxomicin use for *Clostridium*  
448 *difficile* infection. Springerplus 5:1224.
- 449 6. Johnson S, Louie TJ, Gerding DN, Cornely OA, Chasan-Taber S, Fitts D, Gelone  
450 SP, Broom C, Davidson DM, Polymer Alternative for CDITi. 2014. Vancomycin,

- 451 metronidazole, or tolevamer for *Clostridium difficile* infection: results from two  
452 multinational, randomized, controlled trials. Clin Infect Dis 59:345-54.
- 453 7. Sheldon E, Kitchin N, Peng Y, Eiden J, Gruber W, Johnson E, Jansen KU, Pride  
454 MW, Pedneault L. 2016. A phase 1, placebo-controlled, randomized study of the  
455 safety, tolerability, and immunogenicity of a *Clostridium difficile* vaccine  
456 administered with or without aluminum hydroxide in healthy adults. Vaccine  
457 34:2082-91.
- 458 8. Gerding DN, Kelly CP, Rahav G, Lee C, Dubberke ER, Kumar PN, Yacyshyn B,  
459 Kao D, Eves K, Ellison MC, Hanson ME, Guris D, Dorr MB. 2018. Bezlotoxumab  
460 for prevention of recurrent *Clostridium difficile* infection in patients at increased  
461 risk for recurrence. Clin Infect Dis 67:649-656.
- 462 9. Kelly CR, Khoruts A, Staley C, Sadowsky MJ, Abd M, Alani M, Bakow B, Curran  
463 P, McKenney J, Tisch A, Reinert SE, Machan JT, Brandt LJ. 2016. Effect of  
464 Fecal Microbiota Transplantation on recurrence in multiply recurrent *Clostridium*  
465 *difficile* infection: a randomized trial. Ann Intern Med 165:609-616.
- 466 10. Staley C, Kaiser T, Vaughn BP, Graiziger C, Hamilton MJ, Kabage AJ, Khoruts  
467 A, Sadowsky MJ. 2019. Durable long-term bacterial engraftment following  
468 encapsulated fecal microbiota transplantation to treat *Clostridium difficile*  
469 infection. mBio 10.
- 470 11. Bender KO, Garland M, Ferreyra JA, Hryckowian AJ, Child MA, Puri AW, Solow-  
471 Cordero DE, Higginbottom SK, Segal E, Banaei N, Shen A, Sonnenburg JL,  
472 Bogyo M. 2015. A small-molecule antivirulence agent for treating *Clostridium*  
473 *difficile* infection. Sci Transl Med 7:306ra148.

- 474 12. Schewe T. 1995. Molecular actions of ebselen--an antiinflammatory antioxidant.  
475 Gen Pharmacol 26:1153-69.
- 476 13. Azad GK, Tomar RS. 2014. Ebselen, a promising antioxidant drug: mechanisms  
477 of action and targets of biological pathways. Mol Biol Rep 41:4865-79.
- 478 14. Muller A, Cadenas E, Graf P, Sies H. 1984. A novel biologically active seleno-  
479 organic compound--I. Glutathione peroxidase-like activity in vitro and antioxidant  
480 capacity of PZ 51 (Ebselen). Biochem Pharmacol 33:3235-9.
- 481 15. Maiorino M, Roveri A, Ursini F. 1992. Antioxidant effect of Ebselen (PZ 51):  
482 peroxidase mimetic activity on phospholipid and cholesterol hydroperoxides vs  
483 free radical scavenger activity. Arch Biochem Biophys 295:404-9.
- 484 16. Chan G, Hardej D, Santoro M, Lau-Cam C, Billack B. 2007. Evaluation of the  
485 antimicrobial activity of ebselen: role of the yeast plasma membrane H<sup>+</sup>-ATPase.  
486 J Biochem Mol Toxicol 21:252-64.
- 487 17. Thangamani S, Younis W, Seleem MN. 2015. Repurposing ebselen for treatment  
488 of multidrug-resistant staphylococcal infections. Sci Rep 5:11596.
- 489 18. AbdelKhalek A, Abutaleb NS, Mohammad H, Seleem MN. 2018. Repurposing  
490 ebselen for decolonization of vancomycin-resistant enterococci (VRE). PLoS One  
491 13:e0199710.
- 492 19. Gustafsson TN, Osman H, Werngren J, Hoffner S, Engman L, Holmgren A. 2016.  
493 Ebselen and analogs as inhibitors of *Bacillus anthracis* thioredoxin reductase and  
494 bactericidal antibacterials targeting Bacillus species, *Staphylococcus aureus* and  
495 *Mycobacterium tuberculosis*. Biochim Biophys Acta 1860:1265-71.



- 496 20. Azad GK, Balkrishna SJ, Sathish N, Kumar S, Tomar RS. 2012. Multifunctional  
497 ebselen drug functions through the activation of DNA damage response and  
498 alterations in nuclear proteins. *Biochem Pharmacol* 83:296-303.
- 499 21. Lu J, Vlamis-Gardikas A, Kandasamy K, Zhao R, Gustafsson TN, Engstrand L,  
500 Hoffner S, Engman L, Holmgren A. 2013. Inhibition of bacterial thioredoxin  
501 reductase: an antibiotic mechanism targeting bacteria lacking glutathione.  
502 *FASEB J* 27:1394-403.
- 503 22. Holmgren A. 1985. Thioredoxin. *Annu Rev Biochem* 54:237-71.
- 504 23. Gon S, Faulkner MJ, Beckwith J. 2006. *In vivo* requirement for glutaredoxins and  
505 thioredoxins in the reduction of the ribonucleotide reductases of *Escherichia coli*.  
506 *Antioxid Redox Signal* 8:735-42.
- 507 24. Cherian PT, Wu X, Yang L, Scarborough JS, Singh AP, Alam ZA, Lee RE,  
508 Hurdle JG. 2015. Gastrointestinal localization of metronidazole by a lactobacilli-  
509 inspired tetramic acid motif improves treatment outcomes in the hamster model  
510 of *Clostridium difficile* infection. *J Antimicrob Chemother* 70:3061-9.
- 511 25. Gu H, Shi K, Liao Z, Qi H, Chen S, Wang H, Li S, Ma Y, Wang J. 2018. Time-  
512 resolved transcriptome analysis of *Clostridium difficile* R20291 response to  
513 cysteine. *Microbiol Res* 215:114-125.
- 514 26. Jackson S, Calos M, Myers A, Self WT. 2006. Analysis of proline reduction in the  
515 nosocomial pathogen *Clostridium difficile*. *J Bacteriol* 188:8487-95.
- 516 27. Bouillaut L, Dubois T, Francis MB, Daou N, Monot M, Sorg JA, Sonenshein AL,  
517 Dupuy B. 2019. Role of the global regulator Rex in control of NAD(+) -  
518 regeneration in *Clostridioides (Clostridium) difficile*. *Mol Microbiol* 111:1671-1688.

- 519 28. Neumann-Schaal M, Jahn D, Schmidt-Hohagen K. 2019. Metabolism the difficile  
520 way: the key to the success of the pathogen *Clostridioides difficile*. Front  
521 Microbiol 10:219.
- 522 29. Martin-Verstraete I, Peltier J, Dupuy B. 2016. The regulatory networks that  
523 control *Clostridium difficile* toxin synthesis. Toxins (Basel) 8.
- 524 30. Bouillaut L, Self WT, Sonenshein AL. 2013. Proline-dependent regulation of  
525 *Clostridium difficile* Stickland metabolism. J Bacteriol 195:844-54.
- 526 31. Darkoh C, Odo C, DuPont HL. 2016. Accessory gene regulator-1 locus is  
527 essential for virulence and pathogenesis of *Clostridium difficile*. mBio 7.
- 528 32. Ullrich V, Weber P, Meisch F, von Appen F. 1996. Ebselen-binding equilibria  
529 between plasma and target proteins. Biochem Pharmacol 52:15-9.
- 530 33. Sakurai T, Kanayama M, Shibata T, Itoh K, Kobayashi A, Yamamoto M, Uchida  
531 K. 2006. Ebselen, a seleno-organic antioxidant, as an electrophile. Chem Res  
532 Toxicol 19:1196-204.
- 533 34. Brekasis D, Paget MS. 2003. A novel sensor of NADH/NAD<sup>+</sup> redox poise in  
534 *Streptomyces coelicolor* A3(2). EMBO J 22:4856-65.
- 535 35. Garland M, Hryckowian AJ, Tholen M, Bender KO, Van Treuren WW, Loscher S,  
536 Sonnenburg JL, Bogyo M. 2020. The clinical drug ebselen attenuates  
537 inflammation and promotes microbiome recovery in mice after antibiotic  
538 treatment for CDI. Cell Rep Med 1.
- 539 36. Marreddy RKR, Wu X, Sapkota M, Prior AM, Jones JA, Sun D, Hevener KE,  
540 Hurdle JG. 2019. The fatty acid synthesis protein enoyl-acyl reductase ii (FabK) is

541 a target for narrow-spectrum antibacterials for *Clostridium difficile* Infection. ACS  
542 Infect Dis 5:208-217.

543 37. Wu X, Cherian PT, Lee RE, Hurdle JG. 2013. The membrane as a target for  
544 controlling hypervirulent *Clostridium difficile* infections. J Antimicrob Chemother  
545 68:806-15.

546

547

548 **TABLES**549 **Table 1.** Antimicrobial activity of ebselen (EBS) and vancomycin (VAN) against various *C. difficile* strains.

| Strain  | PCR-<br>ribotype | Agar MIC ( $\mu\text{g/ml}$ ) <sup>A</sup> |          |             |     |                        |     |          |       |                      |              |
|---------|------------------|--------------------------------------------|----------|-------------|-----|------------------------|-----|----------|-------|----------------------|--------------|
|         |                  | BHI                                        |          | BHI + blood |     | BHI + 1g/L<br>pyruvate |     | Brucella |       | Wilkins-<br>Chalgren |              |
|         |                  | EBS                                        | VAN      | EBS         | VAN | EBS                    | VAN | EBS      | VAN   | EBS                  | VAN          |
| R20291  | 027              | 4                                          | 0.5-1    | >128        | 1-2 | 8                      | 1   | 128      | 0.5-1 | 32                   | 0.5-1        |
| NR49292 | 001-072          | 4                                          | 0.5-1    | >128        | 1-2 | 16                     | 1   | >128     | 1-2   | 64                   | 0.5-1        |
| NR49305 | 002              | 8                                          | 1        | >128        | 1-2 | 16                     | 1   | >128     | 1-2   | 128                  | 1-2          |
| NR49294 | 014              | 4-8                                        | 0.25-0.5 | >128        | 2-4 | 16                     | 0.5 | >128     | 2     | 32-64                | 0.25-<br>0.5 |
| NR49312 | 017              | 4                                          | 0.25     | >128        | 1-2 | 32                     | 1   | >128     | 2     | 16                   | 0.5          |
| NR49323 | 018              | 4                                          | 1-2      | >128        | 1-2 | 16                     | 1   | >128     | 2     | 32-64                | 0.5-1        |
| NR49277 | 019              | 8                                          | 1-2      | >128        | 1-2 | 16                     | 1   | >128     | 2     | 64                   | 1            |
| NR49300 | 020              | 4                                          | 0.5      | >128        | 1-2 | 16                     | 0.5 | >128     | 1     | 32-64                | 0.5          |
| NR49317 | 024              | 2-4                                        | 0.5      | >128        | 1-2 | 32                     | 1   | >128     | 1-2   | 32-64                | 0.5          |
| NR49314 | 047              | 4                                          | 0.25     | >128        | 1-2 | 16-<br>32              | 1   | >128     | 1-2   | 16-32                | 0.5          |
| NR49325 | 054              | 4                                          | 0.5      | >128        | 1-2 | 16                     | 1   | >128     | 2     | 32-64                | 0.25         |
| NR49318 | 106              | 8-16                                       | 0.5      | >128        | 1-2 | 32                     | 1   | >128     | 2     | 32-64                | 0.5          |

550

551 <sup>A</sup>MICs are from three biological replicates and shown as the range, where obtained; BHI = brain heart infusion.

552

553

554 **Table 2.** Antimicrobial activity of ebselen and vancomycin against a panel of gut  
 555 bacterial species.

| Bacteria                           | Strain | MIC ( $\mu\text{g/ml}$ ) <sup>A</sup> |       |             |       |
|------------------------------------|--------|---------------------------------------|-------|-------------|-------|
|                                    |        | BHI                                   |       | BHI + blood |       |
|                                    |        | EBS                                   | VAN   | EBS         | VAN   |
| <i>Actinomyces viscosus</i>        | HM238  | 2                                     | 0.5   | 64          | 0.5   |
| <i>Bacteroides fragilis</i>        | HM20   | >128                                  | 2     | >128        | 8     |
| <i>Bacteroides ovatus</i>          | HM222  | >128                                  | 1     | >128        | 1     |
| <i>Bacteroides sp.</i>             | HM18   | 128                                   | 4     | >128        | 8     |
| <i>Bacteroides sp.</i>             | HM19   | 128                                   | >32   | 128         | >32   |
| <i>Bacteroides sp.</i>             | HM23   | 128                                   | 2     | >128        | 4     |
| <i>Bacteroides sp.</i>             | HM28   | 64 – 128                              | 2     | 128         | 32    |
| <i>Lactobacillus crispatus</i>     | HM421  | 32                                    | <0.25 | >128        | <0.25 |
| <i>Fusobacterium nucleatum</i>     | HM260  | 4                                     | 8     | 64          | 32    |
| <i>Fusobacterium periodonticum</i> | HM41   | 8                                     | 8     | 128         | 32    |
| <i>Lactobacillus johnsonii</i>     | HM643  | 8 – 16                                | 0.5   | 128         | 0.5   |
| <i>Porphyromonas uenonis</i>       | HM130  | >128                                  | 1     | >128        | 0.5   |

556

557 <sup>A</sup>MICs are from three biological replicates and shown as the range, where obtained; BHI = brain  
 558 heart infusion.

559

560

561 **Table 3.** List of selected genes in *C. difficile* R20291 that are differentially expressed by  
 562 ebselen; their functional classifications are shown.

| <b>Functional group/gene</b>          | <b>Protein names</b>                                        | <b>Fold change</b> |
|---------------------------------------|-------------------------------------------------------------|--------------------|
| <b>Cysteine metabolism</b>            |                                                             |                    |
| <i>cysA</i>                           | Serine O-acetyltransferase                                  | -1.85              |
| <i>cysM</i>                           | Putative O-acetylserine sulfhydrylase                       | -1.73              |
| <i>CDR20291_2078</i>                  | Putative S-methylcysteine transport system                  | 3.965226           |
| <b>Proline reductases</b>             |                                                             |                    |
| <i>prdA</i>                           | D-proline reductase PrdA                                    | 7.11               |
| <i>prdB</i>                           | D-proline reductase PrdB                                    | 6.88               |
| <i>prdC</i>                           | Putative electron transfer protein                          | 2.72               |
| <i>prdF</i>                           | Putative proline racemase                                   | 7.83               |
| <b>Glycolysis and gluconeogenesis</b> |                                                             |                    |
| <i>gapN</i>                           | Glyceraldehyde-3-phosphate dehydrogenase                    | 2.68               |
| <i>pgK</i>                            | Phosphoglycerate kinase                                     | 2.40               |
| <i>gpmI</i>                           | 2,3-bisphosphoglycerate-independent phosphoglycerate mutase | 2.45               |
| <b>Energy generation</b>              |                                                             |                    |
| <i>atpD</i>                           | ATP synthase beta chain                                     | 2.21               |
| <i>atpF</i>                           | ATP synthase B chain                                        | 2.07               |
| <i>atpG</i>                           | ATP synthase subunit gamma                                  | 2.29               |
| <i>rnfA</i>                           | Electron transport complex protein subunit A                | 2.20               |
| <i>rnfC</i>                           | Electron transport complex protein subunit C                | 2.08               |
| <i>rnfD</i>                           | Electron transport complex protein subunit D                | 3.65               |
| <i>rnfE</i>                           | Electron transport complex protein subunit E                | 2.21               |
| <i>rnfG</i>                           | Electron transport complex protein subunit G                | 5.10               |
| <b>Ethanol amine utilization</b>      |                                                             |                    |
| <i>eutA</i>                           | Ethanolamine utilization protein EutA                       | 6.21               |
| <i>eutB</i>                           | Ethanolamine ammonia-lyase large subunit                    | 4.87               |
| <i>eutL</i>                           | Ethanolamine utilization protein EutL                       | 4.31               |
| <b>Cobalamine biosynthesis</b>        |                                                             |                    |
| <i>cbiE</i>                           | Probable amino-acid ABC transporter, ATP-binding protein    | 3.97               |
| <i>cbiF</i>                           | Precorrin-4 C(11)-methyltransferase                         | 3.20               |
| <i>cbiH</i>                           | Cobalt-precorrin-3b C(17)-methyltransferase                 | 2.19               |
| <i>cbiK</i>                           | Sirohydrochlorin cobaltochelataase                          | 2.39               |
| <i>cbiT</i>                           | Probable cobalt-precorrin-6y C(15)-methyltransferase        | 2.51               |

---

**Sporulation**

|                |                                 |       |
|----------------|---------------------------------|-------|
| <i>spo0A</i>   | Stage 0 sporulation protein A   | -2.23 |
| <i>spoIIAA</i> | Stage II sporulation protein AA | 2.42  |
| <i>spoIIC</i>  | Stage II sporulation protein D  | 2.72  |

**Two-component systems and transcriptional regulators**

|             |                                             |       |
|-------------|---------------------------------------------|-------|
| <i>agrB</i> | Accessory gene regulator                    | -2.33 |
| <i>agrD</i> | Autoinducer prepeptide                      | -2.23 |
| <i>rex</i>  | Redox-sensing transcriptional repressor Rex | -2.15 |

---

563

564

565

566

567

568

569 **FIGURES**

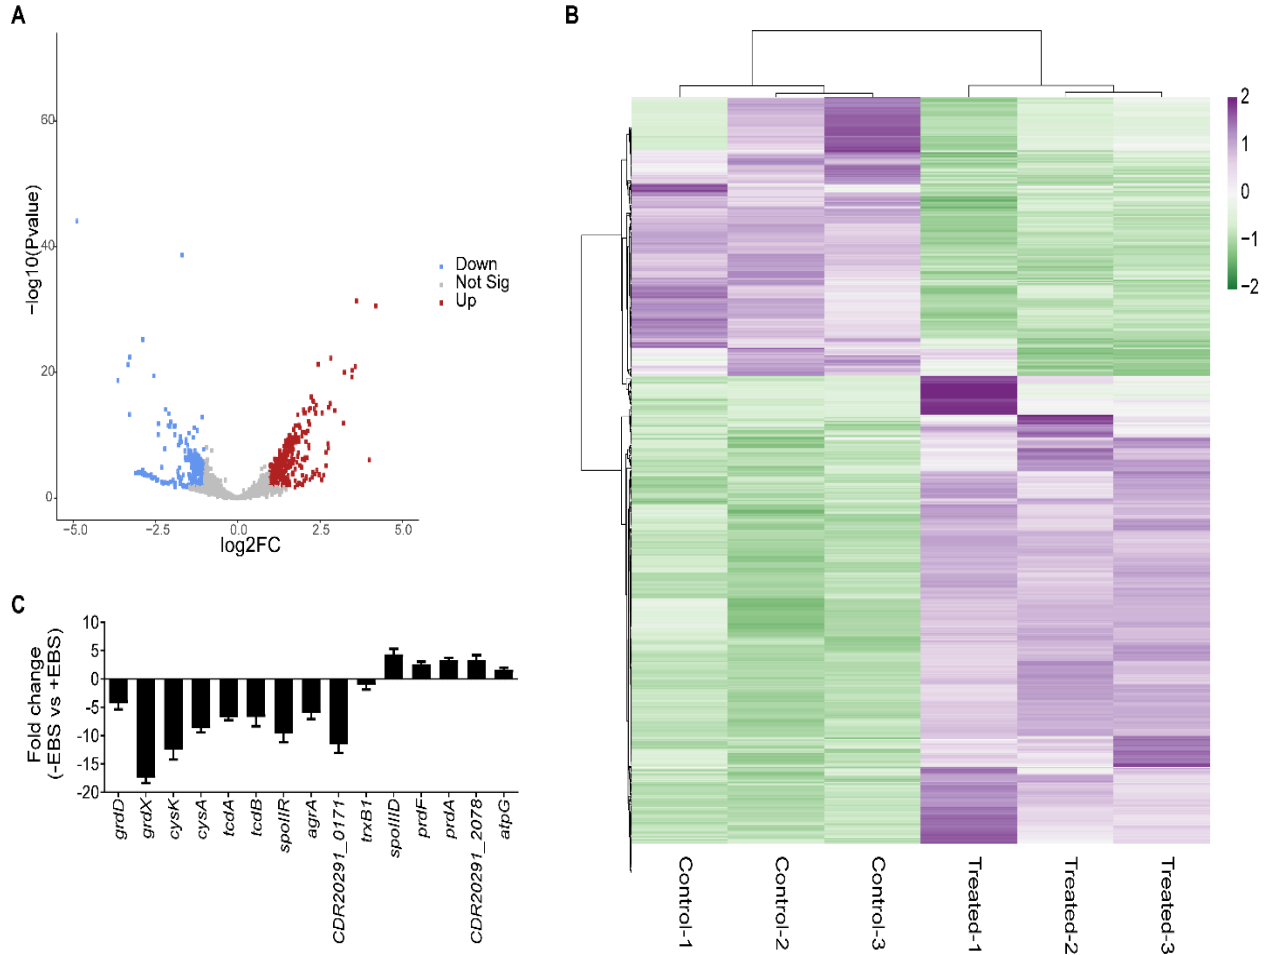

570

571

572 **Figure 1. Analysis of global gene expression in presence of ebselen. *C. difficile***

573 R20291 was grown to early exponential phase ( $\text{OD}_{600} \approx 0.2$ ) and exposed to 16  $\mu\text{g/ml}$  of

574 ebselen for 30 min before RNA was extracted for sequencing. Controls were treated

575 with DMSO. RNAseq data was analyzed on the Galaxy web-based platform. **(A)**The

576 quality of the RNAseq data was analyzed by principle component analysis and data

577 visualized in volcano plots of statistical significance versus fold change. **(B)** Heat map of

578 differentially expressed genes is shown; the color intensity provides a measure of gene

579 expression (purple for upregulated and green for downregulated genes). The heat map



580 was generated using Clustvis software. **(C)** mRNA levels were analyzed for various  
581 genes by RT-qPCR, the fold change was calculated as the difference in mRNA levels of  
582 control vs ebselen treated cells.

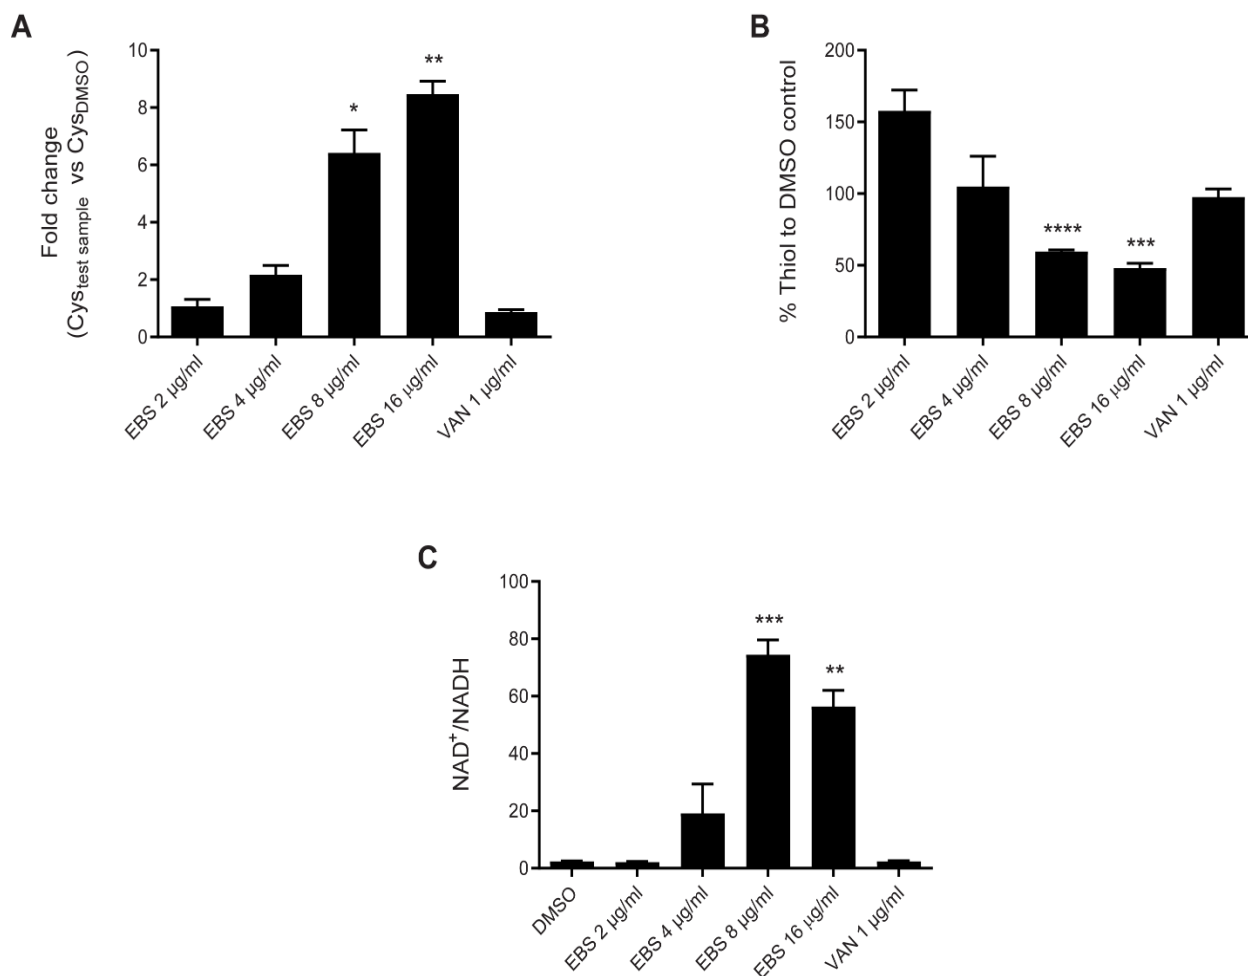

583

584 **Figure 2. Change in cytosolic content of free cysteine, thiols and NAD<sup>+</sup>/ NADH in**

585 **presence of ebselen.** *C. difficile* R20291 were grown to early exponential phase (OD<sub>600</sub>

586 ≈ 0.4) and treated with 2, 4, 8 or 16 µg/ml of ebselen. DMSO and vancomycin (1 µg/ml)

587 were used as controls. Whole cell lysates from the same cultures were used to analyze

588 **(A)** cysteine **(B)** protein free thiols and **(C)** NAD<sup>+</sup>/NADH using respective kits from

589 various manufacturers. For cysteine and thiol quantifications the fold change/percent

590 fold change were calculated for the respective test samples relative to DMSO controls.

591 The data represented were normalized to 1 mg of cellular protein content. Error bar

592 indicate means ± SEM; n = 3 (unpaired t-test with Welch's correction \*P < 0.05, \*\*P < 0.01

593 and \*\*\*P < 0.001; done using Graphpad prism version 8.4).

594

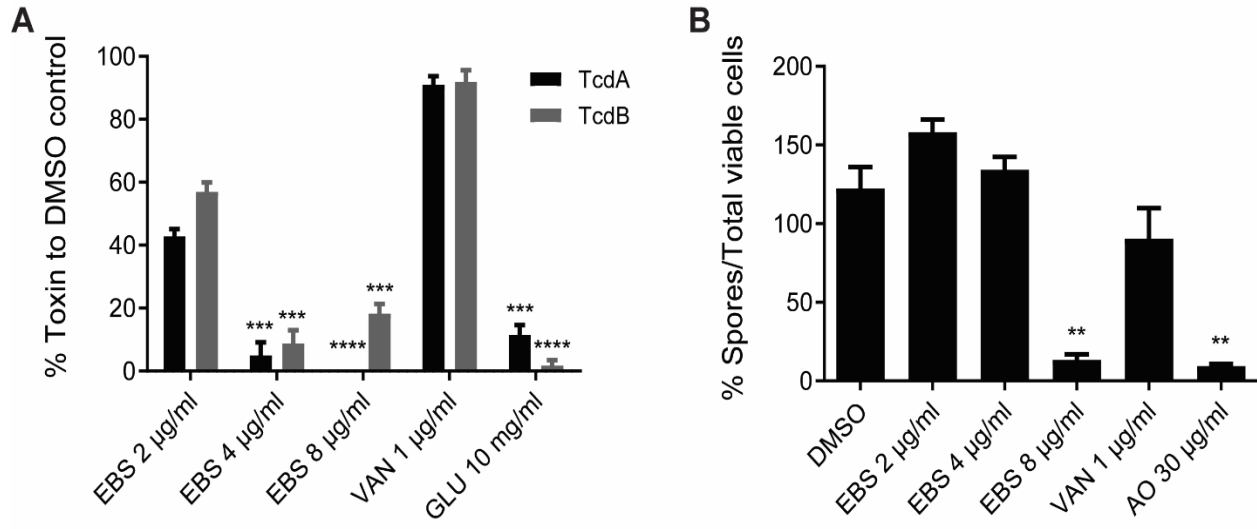

595

596 **Figure 3. Effects of virulence by growth inhibitory concentrations of ebselen. C.**

597 *difficile* R20291 was grown to early exponential phase ( $OD_{600} \approx 0.2$ ) and treated with 2,  
598 4 or 8 µg/ml of ebselen. **(A)** After exposure for 24 h, both TcdA (black bars) and TcdB  
599 (grey bars) were measured from culture supernatants by ELISA. Vancomycin (1 µg/ml)  
600 was a negative control and glucose (1% w/v) a positive control. Data obtained from four  
601 biological replicates were compared with respective DMSO controls. **(B)** Sporulation  
602 was analyzed after 5 days and the percentage of spores expressed per total viable  
603 population. DMSO and vancomycin (1 µg/ml) were negative controls and acridine  
604 orange (AO) at 30 µg/ml was a positive control. Error bar indicate means  $\pm$  SEM;  $n = 3$   
605 (unpaired t-test with Welch's correction \*\* $P < 0.01$ , \*\*\* $P < 0.001$  and \*\*\*\* $P < 0.0001$ ; done  
606 using Graphpad prism version 8.4).
